# Supplementary material for: The relationship between circulating lipids and breast cancer risk: A Mendelian randomization study
Source: PubMed Central journal article supplement (PMC7485834; doi:10.1371/journal.pmed.1003302), 2020-09-11

Exposure

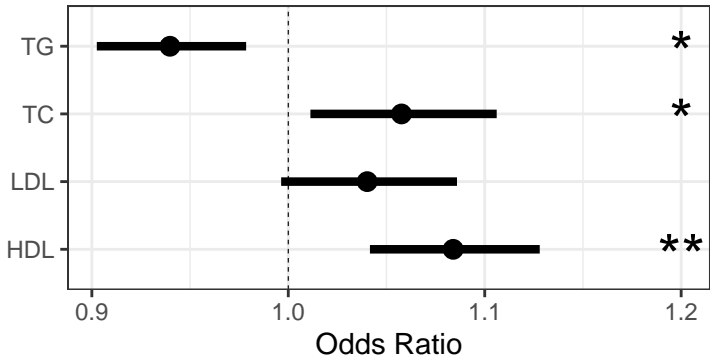

Supplement: pmed.1003302.s006.pdf [file pmed.1003302.s006.pdf]
