# Supplementary material for: The relationship between circulating lipids and breast cancer risk: A Mendelian randomization study
Source: PLoS Med. 2020 Sep 11;17(9):e1003302. doi: 10.1371/journal.pmed.1003302 (PMC7485834; doi:10.1371/journal.pmed.1003302)
Supplement: S13 Table — For each test, 5 traits were used as the exposure traits and ER+ or ER− BC as the outcome. Results are after genetic instrument pruning. Lipid summary statistics are from MVP. N_SNPs: number of genetic instruments used in MR test; CI_95_L: lower bound of 95% CI; CI_95_U: upper bound of 95% CI; P: P-value of MR test. BC, breast cancer; BMI, body mass index; CI, confidence interval; ER, estrogen receptor; HDL, high-density lipoprotein; GLGC, Global Lipids Genetics Consortium; LDL, low-density lipoprotein; MR, Mendelian randomization; MVP, Million Veteran Program; OR, odds ratio; TG, triglycerides. (XLSX) [file pmed.1003302.s028.xlsx]

## Sheet: ST13
Exposure	Outcome	N_SNP	OR	CI_95_L	CI_95_U	P
HDL	ER+	135	1.07068	1.02997	1.11299	0.000553903
LDL	ER+	87	1.01873	0.983832	1.05487	0.296726
TG	ER+	123	0.962953	0.928879	0.998277	0.0399941
BMI	ER+	720	0.937373	0.893466	0.983437	0.00823258
AaM	ER+	204	0.980531	0.950481	1.01153	0.215688
HDL	ER-	148	1.06126	1.0009	1.12526	0.0465952
LDL	ER-	92	1.02036	0.968489	1.07501	0.448919
TG	ER-	141	0.965883	0.915348	1.01921	0.205482
BMI	ER-	764	0.925333	0.863001	0.992168	0.0291841
AaM	ER-	224	0.981322	0.938194	1.02643	0.410918
